# Supplementary material for: Dapagliflozin Ameliorates Neural Damage in the Heart and Kidney of Diabetic Mice
Source: MDPI journal article supplement (doi:10.3390/biomedicines11123324), 2023-12-16
Supplement: s1 [file s1]

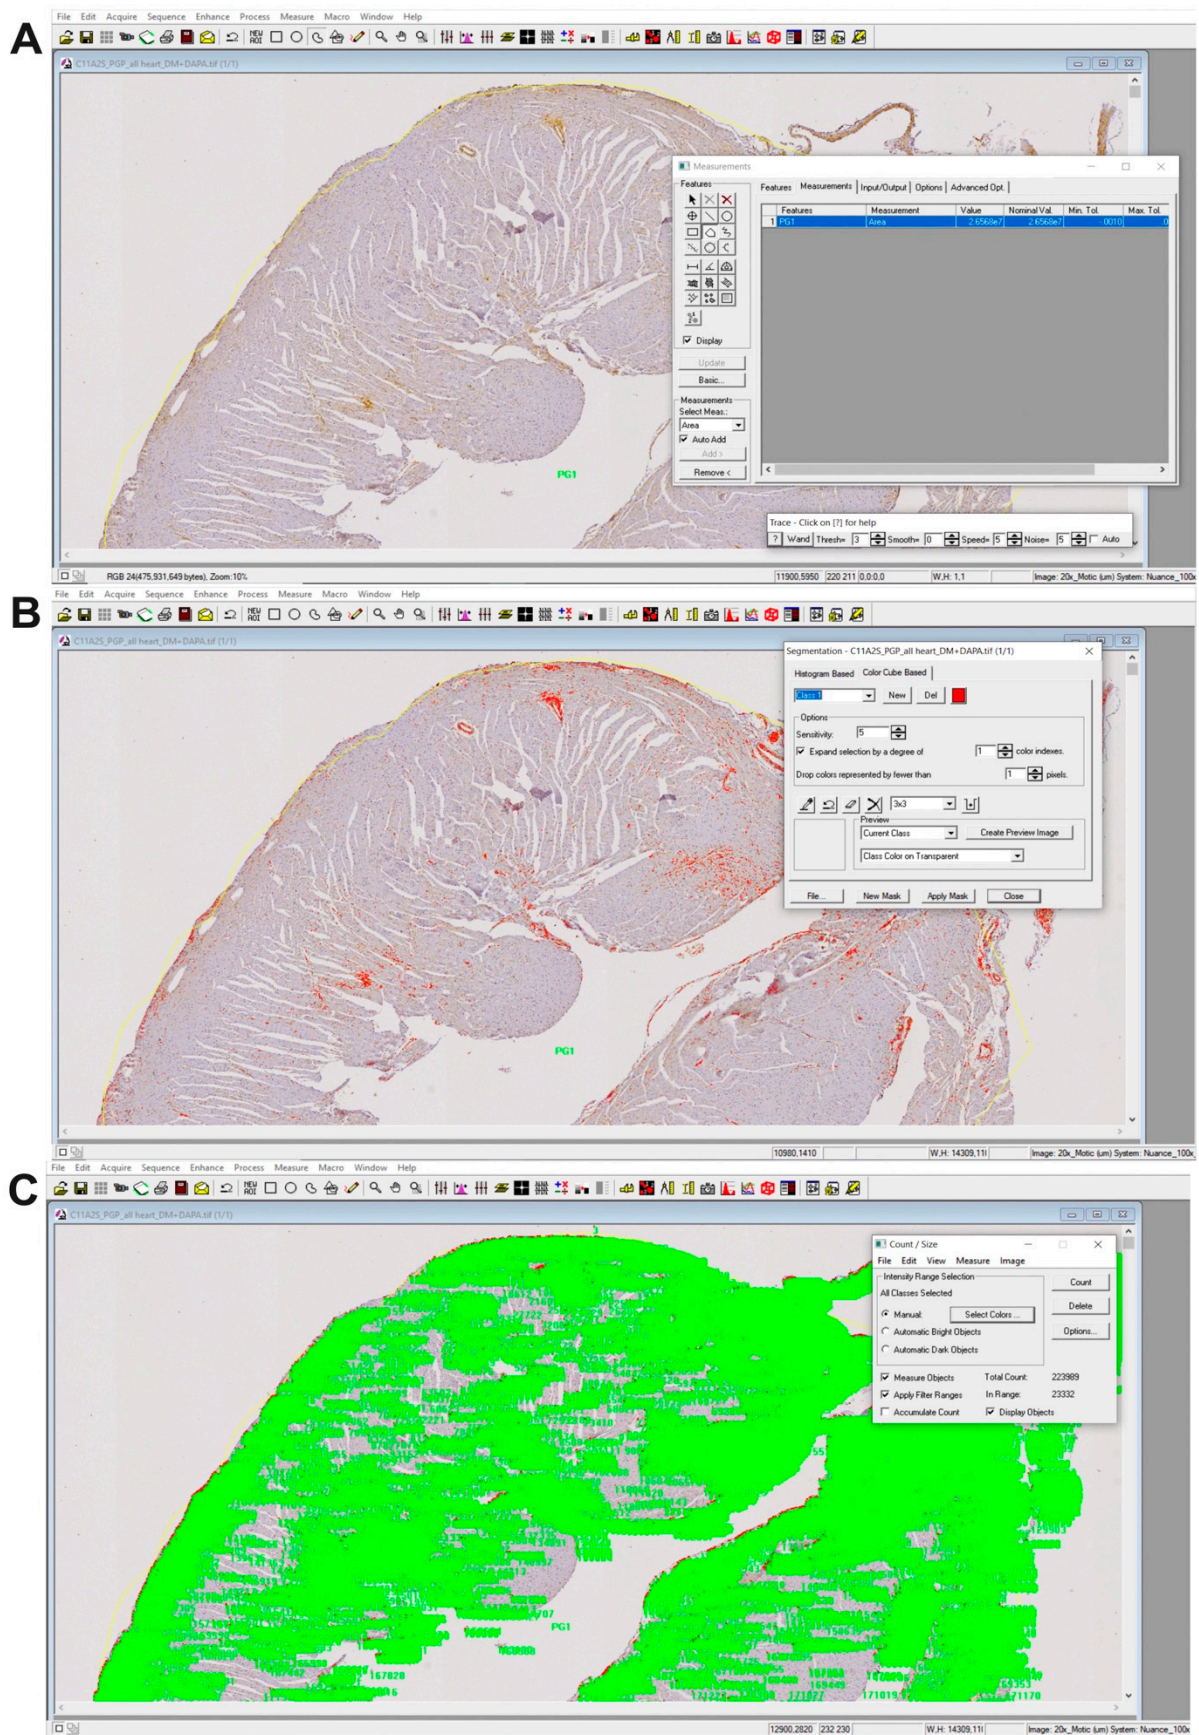

Figure S1. Representative pictures with imaging analysis using Image ProPlus AMS 9 software. A - heart area calculation in mm<sup>2</sup>. B - selecting the appropriate color channel for PGP 9.5. C - Area counting for the corresponding color channel.

Table S1. Mean and standard deviation of mean (SD) of blood glucose for animals enrolled in our study.

|            | Sham<br>(DM-) |       | Control<br>(DM+) |       | Treated<br>(DM+DAPA) |        |
|------------|---------------|-------|------------------|-------|----------------------|--------|
|            | Mean          | SD    | Mean             | SD    | Mean                 | SD     |
| Before STZ | 109,63        | 27,06 | 104,63           | 27,34 | 117,50               | 23,60  |
| W2         | 104,38        | 24,81 | 502,13           | 38,94 | 418,13               | 142,85 |
| W4         | 130,63        | 23,69 | 473,63           | 41,89 | 396,00               | 118,03 |
| W6         | 132,88        | 26,61 | 474,63           | 62,95 | 380,88               | 74,37  |
| W8         | 107,88        | 25,49 | 483,75           | 60,06 | 364,88               | 87,96  |
| W10        | 99,25         | 24,36 | 504,00           | 49,14 | 396,63               | 162,33 |
| W12        | 105,00        | 17,41 | 513,38           | 45,53 | 370,63               | 154,28 |

Table S2. 2way ANOVA multiple comparisons for blood glucose between groups enrolled in our study before and in the weeks after the occurrence of diabetes mellitus.

| Tukey's multiple comparisons test   | Summary | Adjusted P Value |
|-------------------------------------|---------|------------------|
| Before STZ                          |         |                  |
| Sham (DM-) vs. Control (DM+)        | ns      | 0,9286           |
| Sham (DM-) vs. Treated (DM+DAPA)    | ns      | 0,8116           |
| Control (DM+) vs. Treated (DM+DAPA) | ns      | 0,5842           |
| W2                                  |         |                  |
| Sham (DM-) vs. Control (DM+)        | ****    | <0,0001          |
| Sham (DM-) vs. Treated (DM+DAPA)    | ***     | 0,001            |
| Control (DM+) vs. Treated (DM+DAPA) | ns      | 0,298            |
| W4                                  |         |                  |
| Sham (DM-) vs. Control (DM+)        | ****    | <0,0001          |
| Sham (DM-) vs. Treated (DM+DAPA)    | ***     | 0,0008           |
| Control (DM+) vs. Treated (DM+DAPA) | ns      | 0,2405           |
| W6                                  |         |                  |
| Sham (DM-) vs. Control (DM+)        | ****    | <0,0001          |
| Sham (DM-) vs. Treated (DM+DAPA)    | ****    | <0,0001          |
| Control (DM+) vs. Treated (DM+DAPA) | *       | 0,0419           |
| W8                                  |         |                  |
| Sham (DM-) vs. Control (DM+)        | ****    | <0,0001          |
| Sham (DM-) vs. Treated (DM+DAPA)    | ***     | 0,0001           |
| Control (DM+) vs. Treated (DM+DAPA) | *       | 0,0203           |
| W10                                 |         |                  |
| Sham (DM-) vs. Control (DM+)        | ****    | <0,0001          |
| Sham (DM-) vs. Treated (DM+DAPA)    | **      | 0,003            |
| Control (DM+) vs. Treated (DM+DAPA) | ns      | 0,2311           |
| W12                                 |         |                  |
| Sham (DM-) vs. Control (DM+)        | ****    | <0,0001          |
| Sham (DM-) vs. Treated (DM+DAPA)    | **      | 0,0043           |
| Control (DM+) vs. Treated (DM+DAPA) | ns      | 0,082            |

Table S3. Mean and standard deviation of mean (SD) of body weight of the animals enrolled in our study.

|            | Sham<br>(DM-) |      | Control<br>(DM+) |      | Treated<br>(DM+DAPA) |      |
|------------|---------------|------|------------------|------|----------------------|------|
|            | Mean          | SD   | Mean             | SD   | Mean                 | SD   |
| Before STZ | 28,38         | 1,69 | 28,25            | 2,31 | 28,88                | 2,70 |
| W2         | 29,38         | 2,00 | 27,00            | 2,14 | 27,38                | 2,39 |
| W4         | 30,50         | 2,20 | 25,00            | 1,51 | 26,38                | 2,26 |
| W6         | 31,00         | 2,14 | 23,50            | 1,20 | 25,50                | 2,00 |
| W8         | 31,63         | 1,51 | 22,50            | 0,93 | 24,63                | 1,19 |
| W10        | 32,13         | 2,03 | 22,00            | 1,69 | 23,63                | 1,51 |
| W12        | 33,50         | 1,60 | 20,38            | 2,07 | 22,25                | 2,25 |

Table S4. 2way ANOVA multiple comparisons for body weight between groups enrolled in our study before and in the weeks after the occurrence of diabetes mellitus.

| Tukey's multiple comparisons test   | Summary | Adjusted P Value |
|-------------------------------------|---------|------------------|
|                                     |         |                  |
| Before STZ                          |         |                  |
| Sham (DM-) vs. Control (DM+)        | ns      | 0,9916           |
| Sham (DM-) vs. Treated (DM+DAPA)    | ns      | 0,8976           |
| Control (DM+) vs. Treated (DM+DAPA) | ns      | 0,8737           |
|                                     |         |                  |
| W2                                  |         |                  |
| Sham (DM-) vs. Control (DM+)        | ns      | 0,0895           |
| Sham (DM-) vs. Treated (DM+DAPA)    | ns      | 0,2007           |
| Control (DM+) vs. Treated (DM+DAPA) | ns      | 0,9416           |
|                                     |         |                  |
| W4                                  |         |                  |
| Sham (DM-) vs. Control (DM+)        | ***     | 0,0002           |
| Sham (DM-) vs. Treated (DM+DAPA)    | **      | 0,0064           |
| Control (DM+) vs. Treated (DM+DAPA) | ns      | 0,3574           |
|                                     |         |                  |
| W6                                  |         |                  |
| Sham (DM-) vs. Control (DM+)        | ****    | <0,0001          |
| Sham (DM-) vs. Treated (DM+DAPA)    | ***     | 0,0003           |
| Control (DM+) vs. Treated (DM+DAPA) | ns      | 0,0777           |
|                                     |         |                  |
| W8                                  |         |                  |
| Sham (DM-) vs. Control (DM+)        | ****    | <0,0001          |
| Sham (DM-) vs. Treated (DM+DAPA)    | ****    | <0,0001          |
| Control (DM+) vs. Treated (DM+DAPA) | **      | 0,004            |
|                                     |         |                  |
| W10                                 |         |                  |
| Sham (DM-) vs. Control (DM+)        | ****    | <0,0001          |
| Sham (DM-) vs. Treated (DM+DAPA)    | ****    | <0,0001          |
| Control (DM+) vs. Treated (DM+DAPA) | ns      | 0,1419           |
|                                     |         |                  |
| W12                                 |         |                  |
| Sham (DM-) vs. Control (DM+)        | ****    | <0,0001          |
| Sham (DM-) vs. Treated (DM+DAPA)    | ****    | <0,0001          |
| Control (DM+) vs. Treated (DM+DAPA) | ns      | 0,2274           |

Table S5. Mean and standard deviation of mean (SD) of diuresis of the animals enrolled in our study.

|               | Sham<br>(DM-) |          | Control<br>(DM+) |          | Treated<br>(DM+DAPA) |          |
|---------------|---------------|----------|------------------|----------|----------------------|----------|
|               | Mean          | SD       | Mean             | SD       | Mean                 | SD       |
| Before<br>STZ | 0,8375        | 0,226385 | 0,975            | 0,296407 | 0,975                | 0,249285 |
| W2            | 1,0625        | 0,150594 | 5,0375           | 1,048724 | 4,6875               | 0,712014 |
| W4            | 0,925         | 0,198206 | 5,3125           | 0,893528 | 4,675                | 0,533854 |
| W6            | 0,9125        | 0,223207 | 5,35             | 0,781939 | 4,825                | 0,843039 |
| W8            | 0,9875        | 0,274838 | 5,8125           | 0,737636 | 4,625                | 0,905144 |
| W10           | 1             | 0,226779 | 5,4625           | 0,763334 | 4,5375               | 0,792712 |
| W12           | 1,1           | 0,169031 | 5,0125           | 0,904651 | 4,6625               | 0,744384 |

Table S6. 2way ANOVA multiple comparisons for diuresis between groups enrolled in our study before and in the weeks after the occurrence of diabetes mellitus.

| Tukey's multiple comparisons test   | Summary | Adjusted P Value |
|-------------------------------------|---------|------------------|
|                                     |         |                  |
| Before STZ                          |         |                  |
| Sham (DM-) vs. Control (DM+)        | ns      | 0,5642           |
| Sham (DM-) vs. Treated (DM+DAPA)    | ns      | 0,498            |
| Control (DM+) vs. Treated (DM+DAPA) | ns      | >0,9999          |
|                                     |         |                  |
| W2                                  |         |                  |
| Sham (DM-) vs. Control (DM+)        | ****    | <0,0001          |
| Sham (DM-) vs. Treated (DM+DAPA)    | ****    | <0,0001          |
| Control (DM+) vs. Treated (DM+DAPA) | ns      | 0,7211           |
|                                     |         |                  |
| W4                                  |         |                  |
| Sham (DM-) vs. Control (DM+)        | ****    | <0,0001          |
| Sham (DM-) vs. Treated (DM+DAPA)    | ****    | <0,0001          |
| Control (DM+) vs. Treated (DM+DAPA) | ns      | 0,2355           |
|                                     |         |                  |
| W6                                  |         |                  |
| Sham (DM-) vs. Control (DM+)        | ****    | <0,0001          |
| Sham (DM-) vs. Treated (DM+DAPA)    | ****    | <0,0001          |
| Control (DM+) vs. Treated (DM+DAPA) | ns      | 0,4228           |
|                                     |         |                  |
| W8                                  |         |                  |
| Sham (DM-) vs. Control (DM+)        | ****    | <0,0001          |
| Sham (DM-) vs. Treated (DM+DAPA)    | ****    | <0,0001          |
| Control (DM+) vs. Treated (DM+DAPA) | *       | 0,0317           |
|                                     |         |                  |
| W10                                 |         |                  |
| Sham (DM-) vs. Control (DM+)        | ****    | <0,0001          |
| Sham (DM-) vs. Treated (DM+DAPA)    | ****    | <0,0001          |
| Control (DM+) vs. Treated (DM+DAPA) | ns      | 0,0775           |
|                                     |         |                  |
| W12                                 |         |                  |
| Sham (DM-) vs. Control (DM+)        | ****    | <0,0001          |
| Sham (DM-) vs. Treated (DM+DAPA)    | ****    | <0,0001          |
| Control (DM+) vs. Treated (DM+DAPA) | ns      | 0,6825           |
